# Supplementary material
Source: MDPI journal article supplement (https://www.mdpi.com/2673-8007/4/1/37)
Supplement: s1 [file s1]

## Supplementary Tables

**Table S1.** Phasest output for PluMu 3457-1 showing CDS position, top BLASTP hit and E-value.

### Region 1, total 41 CDS

| #  | CDS Position | BLAST Hit                                                                                        | E-Value  |
|----|--------------|--------------------------------------------------------------------------------------------------|----------|
| 1  | 66..1106     | PP_00001;integrase;phage;-;PHAGE_Mannhe_vB_MhS_1152AP2_NC_028956                                 | 0.0      |
| 2  | 1116..1274   | PP_00002;hypothetical protein;phage;-;PHAGE_Mannhe_vB_MhS_1152AP2_NC_028956                      | 8.28e-12 |
| 3  | 1364..1585   | PP_00003;hypothetical protein;phage;-;PHAGE_Haemop_HP1_NC_001697                                 | 8.71e-18 |
| 4  | 1730..2230   | PP_00005;methyltransferase;phage;-;PHAGE_Mannhe_vB_MhS_535AP2_NC_028853                          | 4.61e-78 |
| 5  | 2241..2960   | PP_00006;DNA methyltransferase;phage;-;PHAGE_Strept_9873_NC_047763                               | 1.17e-91 |
| 6  | 3617..4414   | PP_00008;DUF2303 protein;phage;-;PHAGE_Burkho_BcepMig1_NC_019917                                 | 2.89e-32 |
| 7  | 4460..4819   | PP_00009;hypothetical protein;phage;-;PHAGE_Burkho_BcepMig1_NC_019917                            | 6.59e-14 |
| 8  | 4882..5196   | PP_00010;hypothetical protein;phage;-;PHAGE_Burkho_BcepC6B_NC_005887                             | 6.1e-10  |
| 9  | 7236..7463   | PP_00014;hypothetical protein;phage;-;PHAGE_Mannhe_vB_MhS_1152AP2_NC_028956                      | 4.51e-30 |
| 10 | 7728..8003   | PP_00015;plasmid maintenance system killer HigB;phage;-;PHAGE_Mannhe_vB_MhS_535AP2_NC_028853     | 7.24e-61 |
| 11 | 8013..8303   | PP_00016;plasmid maintenance system killer HigA;phage;-;PHAGE_Mannhe_vB_MhS_535AP2_NC_028853     | 5.14e-55 |
| 12 | 8312..8479   | PP_00017;gp6, putative addiction module antidote protein;phage;-;PHAGE_Burkho_phiE12_2_NC_009236 | 1.6e-07  |
| 13 | 8671..9486   | PP_00018;putative DNA adenine methylase;phage;-;PHAGE_Geobac_E3_NC_029073                        | 1.06e-20 |
| 14 | 11209..11883 | PP_00020;CI repressor;phage;-;PHAGE_Mannhe_vB_MhS_535AP2_NC_028853                               | 4.72e-49 |
| 15 | 11992..12207 | PP_00021;phage protein;phage;-;PHAGE_Aggreg_S1249_NC_013597                                      | 5.76e-20 |
| 16 | 12266..12961 | PP_00022;uncharacterized phage-encoded protein;phage;-;PHAGE_Aggreg_S1249_NC_013597              | 1.36e-59 |
| 17 | 12958..13326 | PP_00023;hypothetical protein;phage;-;PHAGE_Mannhe_vB_MhS_587AP2_NC_028743                       | 1.64e-35 |
| 18 | 13265..13981 | PP_00024;hypothetical protein;phage;-;PHAGE_Enterо_mEp390_NC_019721                              | 4.29e-16 |
| 19 | 13984..14508 | PP_00025;DNA N-6-adenine-methyltransferase;phage;-;PHAGE_Mannhe_vB_MhS_587AP2_NC_028743          | 1.44e-36 |
| 20 | 14703..15725 | PP_00026;hypothetical protein;phage;-;PHAGE_Shigel_SfII_NC_021857                                | 5.4e-66  |
| 21 | 15797..16162 | PP_00028;endodeoxyribonuclease RusA;phage;-;PHAGE_Mannhe_vB_MhS_587AP2_NC_028743                 | 1.9e-34  |
| 22 | 16152..16511 | PP_00029;antitermination protein Q;phage;-;PHAGE_Mannhe_vB_MhS_587AP2_NC_028743                  | 2.73e-13 |
| 23 | 18069..19217 | PP_00032;hypothetical protein;phage;-;PHAGE_Coryne_Juicebox_NC_048070                            | 7.54e-34 |
| 24 | 19541..20215 | PP_00033;antirepressor protein Ant;phage;-;PHAGE_Mannhe_vB_MhS_1152AP2_NC_028956                 | 4.2e-23  |
| 25 | 21067..21426 | PP_00036;holin;phage;-;PHAGE_Mannhe_vB_MhS_587AP2_NC_028743                                      | 6.26e-49 |
| 26 | 21416..21862 | PP_00037;lysozyme;phage;-;PHAGE_Erwini_vB_EhrS_59_NC_048198                                      | 5.3e-53  |

| #  | CDS Position | BLAST Hit                                                                                                   | E-Value  |
|----|--------------|-------------------------------------------------------------------------------------------------------------|----------|
| 27 | 21855..22217 | PP_00038;lytic protein Rz;phage;-;PHAGE_Mannhe_vB_MhS_535AP2_NC_028853                                      | 6.88e-55 |
| 28 | 22162..22395 | PP_00039;lytic protein Rz1;phage;-;PHAGE_Mannhe_vB_MhS_587AP2_NC_028743                                     | 1.49e-31 |
| 29 | 22675..23154 | PP_00040;terminase small subunit;phage;-;PHAGE_Enteroc_1_NC_019706                                          | 8.02e-60 |
| 30 | 23154..25271 | PP_00041;bacteriophage DNA packaging protein;terminase, large subunit;phage;-;PHAGE_Phage_Gifsy_2_NC_010393 | 0.0      |
| 31 | 25492..27000 | PP_00043;bacteriophage portal protein;phage;-;PHAGE_Phage_Gifsy_2_NC_010393                                 | 0.0      |
| 32 | 27032..28990 | PP_00044;head maturation protease;phage;-;PHAGE_Enteroc_1_NC_019706                                         | 0.0      |
| 33 | 29064..29387 | PP_00045;hypothetical protein;phage;-;PHAGE_Enteroc_mEp460_NC_019716                                        | 1.37e-21 |
| 34 | 29685..30212 | PP_00047;bacteriophage head-tail assembly protein;Lambda gpZ homolog;phage;-;PHAGE_Phage_Gifsy_1_NC_010392  | 1.07e-27 |
| 35 | 30209..30496 | PP_00048;putative minor tail protein U;phage;-;PROPHAGE_Escher_Sakai                                        | 6.69e-10 |
| 36 | 31415..35014 | PP_00051;putative tail component protein;phage;-;PHAGE_Pseudo_MP22_NC_009818                                | 1.22e-42 |
| 37 | 35014..35754 | PP_00052;tail protein;phage;-;PHAGE_Enteroc_Ajan_NC_028776                                                  | 2.27e-08 |
| 38 | 35765..36319 | PP_00053;hypothetical protein;phage;-;PHAGE_Acinet_vB_AbaS_Loki_NC_042137                                   | 8.55e-26 |
| 39 | 36319..36726 | PP_00054;hypothetical protein;phage;-;PHAGE_Yersin_PY54_NC_005069                                           | 2.53e-10 |
| 40 | 36728..38770 | PP_00055;putative tail fibre protein;phage;-;PHAGE_Acinet_vB_AbaS_Loki_NC_042137                            | 3.19e-77 |
| 41 | 38815..40785 | PP_00056;tail fiber protein;phage;-;PHAGE_Klebsi_TSK1_NC_048126                                             | 2.95e-10 |

**Table S2.** Phasest output for PluMu 3457-2 showing CDS position, top BLASTP hit and E-value.

| #  | CDS Position | BLAST Hit                                                                                 | E-Value  |
|----|--------------|-------------------------------------------------------------------------------------------|----------|
| 1  | 1..423       | PP_00001;transposase;phage;-;PHAGE_Mannhe_vB_MhM_3927AP2_NC_028766                        | 5.81e-15 |
| 2  | 635..847     | PP_00002;transcriptional regulatory protein;phage;-;PHAGE_Mannhe_vB_MhM_3927AP2_NC_028766 | 4.92e-28 |
| 3  | 859..2823    | PP_00003;transposase;phage;-;PHAGE_Vibrio_12B12_NC_021070                                 | 0.0      |
| 4  | 2883..3800   | PP_00004;transposase B;phage;-;PHAGE_Bacill_BalMu_1_NC_030945                             | 3.32e-30 |
| 5  | 3804..4115   | PP_00005;hypothetical protein;phage;-;PHAGE_Mannhe_vB_MhM_3927AP2_NC_028766               | 2.03e-09 |
| 6  | 4391..4921   | PP_00007;host-nuclease inhibitor protein;phage;-;PHAGE_Haemop_SuMu_NC_019455              | 9.97e-64 |
| 7  | 5296..5484   | PP_00009;hypothetical protein;phage;-;PHAGE_Mannhe_vB_MhM_3927AP2_NC_028766               | 1.66e-08 |
| 8  | 5494..5667   | PP_00010;hypothetical protein;phage;-;PHAGE_Mannhe_vB_MhM_3927AP2_NC_028766               | 8.56e-11 |
| 9  | 6074..6691   | PP_00011;antirepressor;phage;-;PHAGE_Mannhe_vB_MhS_587AP2_NC_028743                       | 1.49e-27 |
| 10 | 7070..7615   | PP_00013;hypothetical protein;phage;-;PHAGE_Vibrio_12B12_NC_021070                        | 5.07e-20 |
| 11 | 7602..8156   | PP_00014;hypothetical protein;phage;-;PHAGE_Mannhe_vB_MhM_3927AP2_NC_028766               | 8.76e-55 |

| #  | CDS Position | BLAST Hit                                                                                      | E-Value   |
|----|--------------|------------------------------------------------------------------------------------------------|-----------|
| 12 | 8301..8723   | PP_00015;putative transcription regulator;phage;-;PHAGE_Enterо_Mu_NC_000929                    | 3.33e-34  |
| 13 | 8812..9357   | PP_00016;putative N-acetylmuramoyl-L-alanine amidase;phage;-;PHAGE_Haemop_SuMu_NC_019455       | 6.94e-105 |
| 14 | 9984..10211  | PP_00018;DksA-like zinc finger domain containing protein;phage;-;PHAGE_Yersin_L_413C_NC_004745 | 1.05e-07  |
| 15 | 10208..10537 | PP_00019;hypothetical protein;phage;-;PHAGE_Escher_D108_NC_013594                              | 1.66e-06  |
| 16 | 10543..10836 | PP_00020;hypothetical protein;phage;-;PHAGE_Escher_D108_NC_013594                              | 9.11e-36  |
| 17 | 10870..11442 | PP_00021;hypothetical protein;phage;-;PHAGE_Vibrio_12B12_NC_021070                             | 3.32e-56  |
| 18 | 11439..13019 | PP_00022;portal protein;phage;-;PHAGE_Vibrio_12B12_NC_021070                                   | 1.28e-178 |
| 19 | 13021..14586 | PP_00023;portal protein;phage;-;PHAGE_Enterо_SfMu_NC_027382                                    | 1.15e-180 |
| 20 | 14573..15910 | PP_00024;head morphogenesis protein;phage;-;PHAGE_Enterо_SfMu_NC_027382                        | 4.31e-113 |
| 21 | 16115..16549 | PP_00025;putative virion morphogenesis protein;phage;-;PHAGE_Enterо_Mu_NC_000929               | 1.28e-15  |
| 22 | 16780..17853 | PP_00026;putative protease protein;phage;-;PHAGE_Enterо_Mu_NC_000929                           | 3.95e-95  |
| 23 | 17853..18779 | PP_00027;major head protein;phage;-;PHAGE_Escher_D108_NC_013594                                | 1.84e-113 |
| 24 | 19249..19656 | PP_00029;hypothetical protein;phage;-;PHAGE_Enterо_SfMu_NC_027382                              | 1.01e-25  |
| 25 | 19653..20078 | PP_00030;hypothetical protein;phage;-;PHAGE_Enterо_SfMu_NC_027382                              | 2.87e-31  |
| 26 | 20092..20835 | PP_00031;hypothetical protein;phage;-;PHAGE_Ralsto_RS138_NC_029107                             | 1.05e-47  |
| 27 | 21627..21974 | PP_00033;hypothetical protein;phage;-;PHAGE_Stx2_c_Stx2a_WGPS9_NC_049923                       | 6.57e-16  |
| 28 | 22030..22626 | PP_00034;hypothetical protein;phage;-;PHAGE_Stx2_c_Stx2a_WGPS9_NC_049923                       | 6.08e-15  |
| 29 | 22676..23041 | PP_00035;hypothetical protein;phage;-;PHAGE_Stx2_c_Stx2a_WGPS9_NC_049923                       | 2.08e-18  |

**Table S3.** Phasest output for PluMu 3459-1 showing CDS position, top BLASTP hit and E-value.

| # | CDS Position | BLAST Hit                                                                                 | E-Value  |
|---|--------------|-------------------------------------------------------------------------------------------|----------|
| 1 | 1..423       | PP_00001;transposase;phage;-;PHAGE_Mannhe_vB_MhM_3927AP2_NC_028766                        | 5.81e-15 |
| 2 | 635..847     | PP_00002;transcriptional regulatory protein;phage;-;PHAGE_Mannhe_vB_MhM_3927AP2_NC_028766 | 4.92e-28 |
| 3 | 859..2823    | PP_00003;transposase;phage;-;PHAGE_Vibrio_12B12_NC_021070                                 | 0.0      |
| 4 | 2883..3800   | PP_00004;transposase B;phage;-;PHAGE_Bacill_BalMu_1_NC_030945                             | 3.32e-30 |
| 5 | 3804..4115   | PP_00005;hypothetical protein;phage;-;PHAGE_Mannhe_vB_MhM_3927AP2_NC_028766               | 2.03e-09 |
| 6 | 4391..4921   | PP_00007;host-nuclease inhibitor protein;phage;-;PHAGE_Haemop_SuMu_NC_019455              | 9.97e-64 |
| 7 | 5296..5490   | PP_00009;hypothetical protein;phage;-;PHAGE_Mannhe_vB_MhM_3927AP2_NC_028766               | 1.65e-08 |

| #  | CDS Position | BLAST Hit                                                                                      | E-Value   |
|----|--------------|------------------------------------------------------------------------------------------------|-----------|
| 8  | 5716..6390   | PP_00011;hypothetical protein;phage;-;PHAGE_Aeromo_phiA8_29_NC_048660                          | 2.71e-32  |
| 9  | 6883..7431   | PP_00014;hypothetical protein;phage;-;PHAGE_Vibrio_12B12_NC_021070                             | 1.62e-20  |
| 10 | 7418..7972   | PP_00015;hypothetical protein;phage;-;PHAGE_Mannhe_vB_MhM_3927AP2_NC_028766                    | 8.76e-55  |
| 11 | 8117..8539   | PP_00016;putative transcription regulator;phage;-;PHAGE_Enterо_Mu_NC_000929                    | 3.33e-34  |
| 12 | 8628..9173   | PP_00017;putative N-acetylmuramoyl-L-alanine amidase;phage;-;PHAGE_Haemop_SuMu_NC_019455       | 6.94e-105 |
| 13 | 9180..9404   | PP_00018;hypothetical protein;phage;-;PHAGE_Haemop_SuMu_NC_019455                              | 2.73e-16  |
| 14 | 9800..10027  | PP_00020;DksA-like zinc finger domain containing protein;phage;-;PHAGE_Yersin_L_413C_NC_004745 | 1.05e-07  |
| 15 | 10027..10353 | PP_00021;hypothetical protein;phage;-;PHAGE_Escher_D108_NC_013594                              | 1.62e-06  |
| 16 | 10359..10652 | PP_00022;hypothetical protein;phage;-;PHAGE_Escher_D108_NC_013594                              | 9.11e-36  |
| 17 | 10686..11258 | PP_00023;hypothetical protein;phage;-;PHAGE_Vibrio_12B12_NC_021070                             | 3.32e-56  |
| 18 | 11255..12835 | PP_00024;portal protein;phage;-;PHAGE_Vibrio_12B12_NC_021070                                   | 1.28e-178 |
| 19 | 12837..14402 | PP_00025;portal protein;phage;-;PHAGE_Enterо_SfMu_NC_027382                                    | 1.15e-180 |
| 20 | 14389..15726 | PP_00026;head morphogenesis protein;phage;-;PHAGE_Enterо_SfMu_NC_027382                        | 4.31e-113 |
| 21 | 15931..16365 | PP_00027;putative virion morphogenesis protein;phage;-;PHAGE_Enterо_Mu_NC_000929               | 1.28e-15  |
| 22 | 16596..17669 | PP_00028;putative protease protein;phage;-;PHAGE_Enterо_Mu_NC_000929                           | 3.95e-95  |
| 23 | 17669..18595 | PP_00029;major head protein;phage;-;PHAGE_Escher_D108_NC_013594                                | 1.84e-113 |
| 24 | 19065..19472 | PP_00031;hypothetical protein;phage;-;PHAGE_Enterо_SfMu_NC_027382                              | 1.01e-25  |
| 25 | 19469..19894 | PP_00032;hypothetical protein;phage;-;PHAGE_Enterо_SfMu_NC_027382                              | 2.87e-31  |
| 26 | 19908..20651 | PP_00033;hypothetical protein;phage;-;PHAGE_Ralsto_RS138_NC_029107                             | 1.05e-47  |
| 27 | 20709..21119 | PP_00034;hypothetical protein;phage;-;PHAGE_Pseudo_JBD93_NC_030918                             | 7.75e-22  |
| 28 | 21565..24924 | PP_00036;tail length tape measure protein;phage;-;PHAGE_Enterо_mEр390_NC_019721                | 3.74e-40  |
| 29 | 24924..25922 | PP_00037;hypothetical protein;phage;-;PHAGE_Pseudo_JBD67_NC_042135                             | 8.49e-42  |
| 30 | 25925..26890 | PP_00038;hypothetical protein;phage;-;PHAGE_Pseudo_vB_PaeS_PM105_NC_028667                     | 2.3e-40   |
| 31 | 26893..28575 | PP_00039;hypothetical protein;phage;-;PHAGE_Pseudo_DMS3_NC_008717                              | 2.52e-108 |
| 32 | 28612..29421 | PP_00040;BR0599 family protein;phage;-;PHAGE_Salmon_KFS_SE1_NC_048683                          | 3.29e-56  |
| 33 | 29439..29690 | PP_00041;conserved tail assembly protein;phage;-;PHAGE_Burkho_BcepNazgul_NC_005091             | 1.08e-19  |
| 34 | 29695..29898 | PP_00042;tail assembly protein;phage;-;PHAGE_Vibrio_VpKK5_NC_026610                            | 1.73e-16  |
| 35 | 29898..32681 | PP_00043;conserved tail assembly protein;phage;-;PHAGE_Burkho_BcepNazgul_NC_005091             | 6.5e-142  |
| 36 | 33040..33435 | PP_00044;phage protein;phage;-;PHAGE_Strept_phiBHN167_NC_022791                                | 5.03e-47  |
| 37 | 33413..33796 | PP_00045;putative C-5 cytosine-specific DNA methylase;phage;-;PHAGE_Strept_phiNJ2_NC_019418    | 1.7e-38   |
| 38 | 33789..34625 | PP_00046;hypothetical protein;phage;-;PHAGE_Haemop_SuMu_NC_019455                              | 2.04e-137 |

| # CDS Position  | BLAST Hit                                                                                           | E-Value  |
|-----------------|-----------------------------------------------------------------------------------------------------|----------|
| 39 35450..36028 | PP_00048;DNA-directed RNA polymerase specialized sigma subunit;phage;-;PHAGE_Sinorh_phiM9_NC_028676 | 2.77e-08 |

**Table S4.** Phasest output for PluMu 3459-2 showing CDS position, top BLASTP hit and E-value.

| # CDS Position  | BLAST Hit                                                                                                   | E-Value  |
|-----------------|-------------------------------------------------------------------------------------------------------------|----------|
| 1 9118..11088   | PP_00011;tail fiber protein;phage;-;PHAGE_Klebsi_TSK1_NC_048126                                             | 2.95e-10 |
| 2 11133..13175  | PP_00012;putative tail fibre protein;phage;-;PHAGE_Acinet_vB_AbaS_Loki_NC_042137                            | 3.19e-77 |
| 3 13177..13584  | PP_00013;hypothetical protein;phage;-;PHAGE_Yersin_PY54_NC_005069                                           | 2.53e-10 |
| 4 13584..14138  | PP_00014;hypothetical protein;phage;-;PHAGE_Acinet_vB_AbaS_Loki_NC_042137                                   | 8.55e-26 |
| 5 14138..14878  | PP_00015;tail protein;phage;-;PHAGE_Entero_CAjan_NC_028776                                                  | 1.43e-13 |
| 6 14878..18477  | PP_00016;putative tail component protein;phage;-;PHAGE_Pseudo_MP22_NC_009818                                | 1.22e-42 |
| 7 19260..19676  | PP_00019;putative minor tail protein U;phage;-;PROPHAGE_Escher_Sakai                                        | 3.79e-14 |
| 8 19673..20200  | PP_00020;bacteriophage head-tail assembly protein;Lambda gpZ homolog;phage;-;PHAGE_Phage_Gifsy_1_NC_010392  | 1.07e-27 |
| 9 20498..20821  | PP_00022;hypothetical protein;phage;-;PHAGE_Entero_mEp460_NC_019716                                         | 1.37e-21 |
| 10 20895..22853 | PP_00023;head maturation protease;phage;-;PHAGE_Entero_c_1_NC_019706                                        | 0.0      |
| 11 22885..24393 | PP_00024;bacteriophage portal protein;phage;-;PHAGE_Phage_Gifsy_2_NC_010393                                 | 0.0      |
| 12 24614..26731 | PP_00026;bacteriophage DNA packaging protein;terminase, large subunit;phage;-;PHAGE_Phage_Gifsy_2_NC_010393 | 0.0      |
| 13 26731..27210 | PP_00027;terminase small subunit;phage;-;PHAGE_Entero_c_1_NC_019706                                         | 8.02e-60 |
| 14 27490..27723 | PP_00028;lytic protein Rz1;phage;-;PHAGE_Mannhe_vB_MhS_587AP2_NC_028743                                     | 1.49e-31 |
| 15 27668..28030 | PP_00029;lytic protein Rz;phage;-;PHAGE_Mannhe_vB_MhS_535AP2_NC_028853                                      | 6.88e-55 |
| 16 28023..28469 | PP_00030;lysozyme;phage;-;PHAGE_Erwini_vB_EhrS_59_NC_048198                                                 | 5.3e-53  |
| 17 28459..28818 | PP_00031;holin;phage;-;PHAGE_Mannhe_vB_MhS_587AP2_NC_028743                                                 | 6.26e-49 |
| 18 29670..30344 | PP_00034;antirepressor protein Ant;phage;-;PHAGE_Mannhe_vB_MhS_1152AP2_NC_028956                            | 4.2e-23  |
| 19 30668..31816 | PP_00035;hypothetical protein;phage;-;PHAGE_Coryne_Juicebox_NC_048070                                       | 1.02e-33 |
| 20 33374..33733 | PP_00038;antitermination protein Q;phage;-;PHAGE_Mannhe_vB_MhS_587AP2_NC_028743                             | 2.73e-13 |
| 21 33723..34088 | PP_00039;endodeoxyribonuclease RusA;phage;-;PHAGE_Mannhe_vB_MhS_587AP2_NC_028743                            | 1.9e-34  |
| 22 34160..35182 | PP_00041;hypothetical protein;phage;-;PHAGE_Shigel_SfII_NC_021857                                           | 5.4e-66  |
| 23 35175..35393 | PP_00042;hypothetical protein;phage;-;PHAGE_Mannhe_vB_MhS_535AP2_NC_028853                                  | 2.78e-08 |
| 24 35377..35901 | PP_00043;DNA N-6-adenine-methyltransferase;phage;-;PHAGE_Mannhe_vB_MhS_587AP2_NC_028743                     | 1.44e-36 |
| 25 35904..36620 | PP_00044;hypothetical protein;phage;-;PHAGE_Entero_mEp390_NC_019721                                         | 4.29e-16 |
| 26 36559..36927 | PP_00045;hypothetical protein;phage;-;PHAGE_Mannhe_vB_MhS_587AP2_NC_028743                                  | 1.64e-35 |

| #  | CDS Position | BLAST Hit                                                                                        | E-Value   |
|----|--------------|--------------------------------------------------------------------------------------------------|-----------|
| 27 | 36924..37619 | PP_00046;uncharacterized phage-encoded protein;phage;-;PHAGE_Aggreg_S1249_NC_013597              | 1.36e-59  |
| 28 | 37678..37893 | PP_00047;phage protein;phage;-;PHAGE_Aggreg_S1249_NC_013597                                      | 5.76e-20  |
| 29 | 38002..38676 | PP_00048;CI repressor;phage;-;PHAGE_Mannhe_vB_MhS_535AP2_NC_028853                               | 4.72e-49  |
| 30 | 40399..41214 | PP_00050;putative DNA adenine methylase;phage;-;PHAGE_Geobac_E3_NC_029073                        | 1.06e-20  |
| 31 | 41406..41573 | PP_00051;gp6, putative addiction module antidote protein;phage;-;PHAGE_Burkho_phiE12_2_NC_009236 | 1.6e-07   |
| 32 | 41582..41872 | PP_00052;plasmid maintenance system killer HigA;phage;-;PHAGE_Mannhe_vB_MhS_535AP2_NC_028853     | 5.14e-55  |
| 33 | 41882..42157 | PP_00053;plasmid maintenance system killer HigB;phage;-;PHAGE_Mannhe_vB_MhS_535AP2_NC_028853     | 7.24e-61  |
| 34 | 42422..42649 | PP_00054;hypothetical protein;phage;-;PHAGE_Mannhe_vB_MhS_1152AP2_NC_028956                      | 4.51e-30  |
| 35 | 44689..45003 | PP_00058;hypothetical protein;phage;-;PHAGE_Burkho_BcepC6B_NC_005887                             | 6.1e-10   |
| 36 | 45066..45425 | PP_00059;hypothetical protein;phage;-;PHAGE_Burkho_BcepMigl_NC_019917                            | 6.59e-14  |
| 37 | 45471..46268 | PP_00060;DUF2303 protein;phage;-;PHAGE_Burkho_BcepMigl_NC_019917                                 | 2.89e-32  |
| 38 | 46861..47664 | PP_00062;hypothetical protein;phage;-;PHAGE_Strept_phiARI0468_4_NC_031915                        | 1.96e-101 |
| 39 | 47675..48175 | PP_00063;methyltransferase;phage;-;PHAGE_Mannhe_vB_MhS_535AP2_NC_028853                          | 4.61e-78  |
| 40 | 48320..48541 | PP_00065;hypothetical protein;phage;-;PHAGE_Haemop_HP1_NC_001697                                 | 8.71e-18  |
| 41 | 48631..48789 | PP_00066;hypothetical protein;phage;-;PHAGE_Mannhe_vB_MhS_1152AP2_NC_028956                      | 8.28e-12  |
| 42 | 48799..49839 | PP_00067;integrase;phage;-;PHAGE_Mannhe_vB_MhS_1152AP2_NC_028956                                 | 0.0       |
